# Supplementary material for: MiR-23-TrxR1 as a novel molecular axis in skeletal muscle differentiation
Source: PubMed Central journal article supplement (PMC5543121; doi:10.1038/s41598-017-07575-0), 2017-08-03

## **MiR-23-TrxR1 as a novel molecular axis in skeletal muscle differentiation**

Neri Mercatelli, Simona Fittipaldi, Elisa De Paola, Ivan Dimauro, Maria Paola Paronetto, Malcolm J Jackson, Daniela Caporossi

### **SUPPLEMENTARY INFORMATIONS**

**Supplementary Figure 1. TrxR1 is expressed in skeletal muscle tissues and its expression is downregulated during C2C12 muscle differentiation**

**a)** Western blot analysis showing the protein contents of TrxR1 in *gastrocnemius* (G), *extensor digitorius longus* (E), *soleus* (S) and C2C12 myoblasts (M). **b)** Immunofluorescence analysis showing TrxR1 expression during C2C12 muscle differentiation (scale bar: 50µM, magnification: 40X).

**Supplementary Figure 2. The oxidative status of Trx1 does not change during C2C12 muscle differentiation.**

Representative image of the redox western blot showing the redox status (red: reduced, ox: oxidized) of Trx1 in C2C12 cells myoblasts (GM) treated (NaAsO<sub>2</sub> for 1 hours) or not (Ctrl) with NaAsO<sub>2</sub> and collected at different time points of differentiation (1, 2, 3 and 5 days).

**Supplementary Figure 3. TrxR1 siRNA specificity.**

**a)** western blot showing the reduction of TrxR1 expression after siTrxR1 siRNA N°1, N°2 and N°3 transfection. **b)** RT-qPCR analysis showing the expression levels of pax7 and myf5 mRNA.

**Supplementary Figure 4. TrxR1 is necessary to myogenic process.**

C2C12 were transfected or not (mock) with TrxR1 siRNA or a scramble siRNA (scr siRNA) and analysed at D1, D2 and D4 from differentiation induction. **a)** Representative image of the western blot analysis showing the protein expression of TrxR1, MyHC, Myogenin and  $\beta$ -actin. The amount of TrxR1, MyHC and Myogenin (**b)** in each sample was calculated by normalizing to  $\beta$ -actin protein levels. Results are represented as mean  $\pm$  SEM of at least three different experiments. **c)** Representative image (20x magnification) of the immunofluorescence analysis showing MyHC expression at D3 of differentiation. **d)** Fusion index relative to D3.

**Supplementary Figure 5. miR-23 a and b overexpression reduces the mRNA levels of TrxR1 and negatively affects C2C12 cellular growth.**

C2C12 were transfected with miR-23 a, miR-23b or scr mimic and cultured in GM conditions. **a)** RT-qPCR showing the expression levels of TrxR1 mRNA at 36 and 48 hours after transfections. The value of scr miR samples was arbitrarily set=1. **b)** MTS assay measured (OD) at 24, 48 and 72 hours after transfection.

# Supplementary Fig. S1

a)

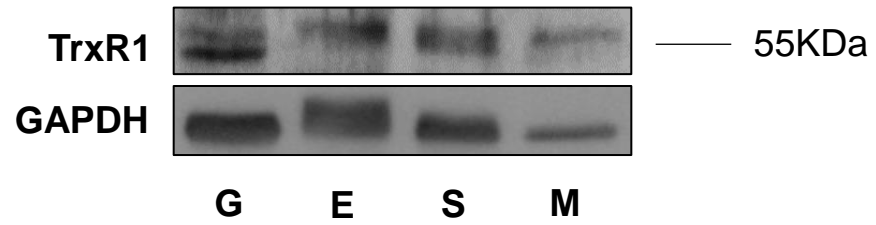

1. G: *Gastrocnemius*
2. E: *Extensor digitorum longus*
3. S: *Soleus*
4. M: *C2C12 myoblasts*

b)

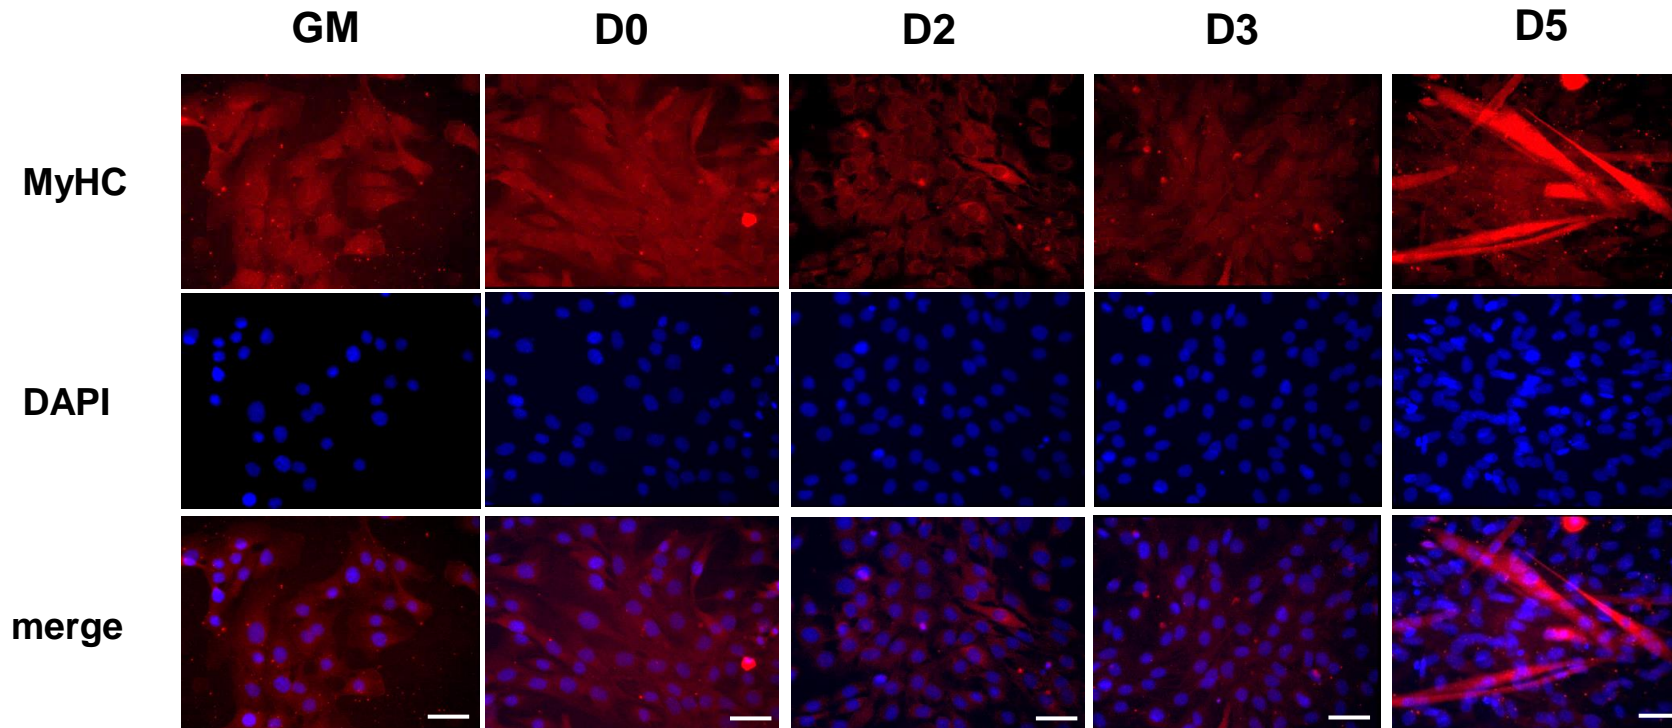

Supplementary Fig. S2

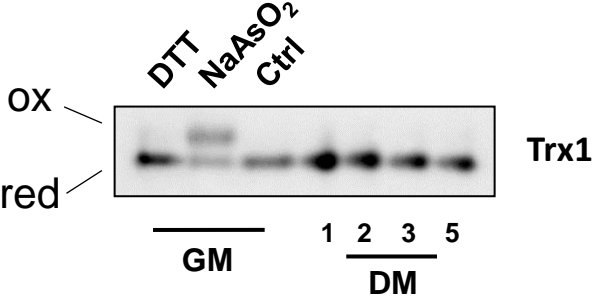

### Supplementary Fig. S3

a)

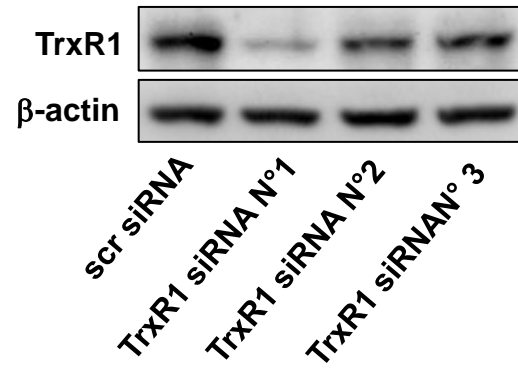

b)

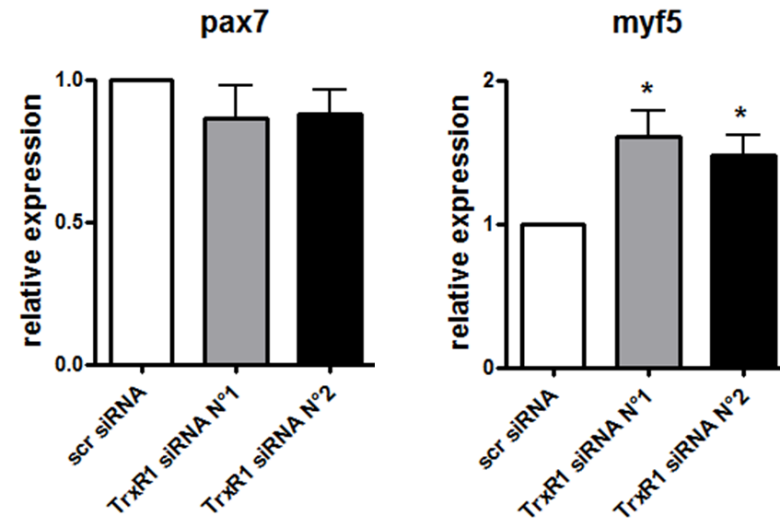

## Supplementary Fig. S4

a)

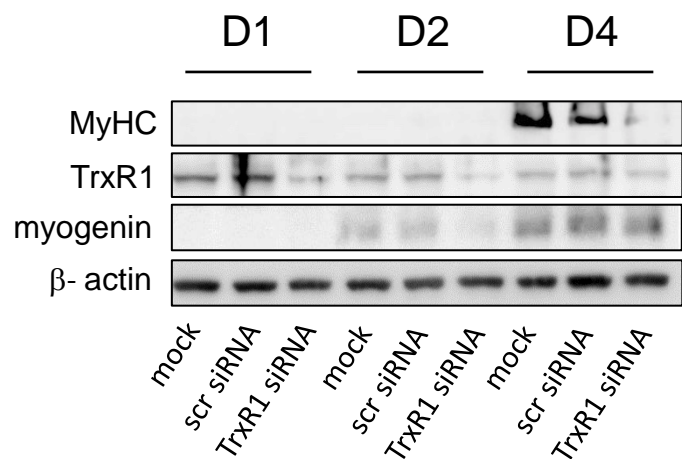

b)

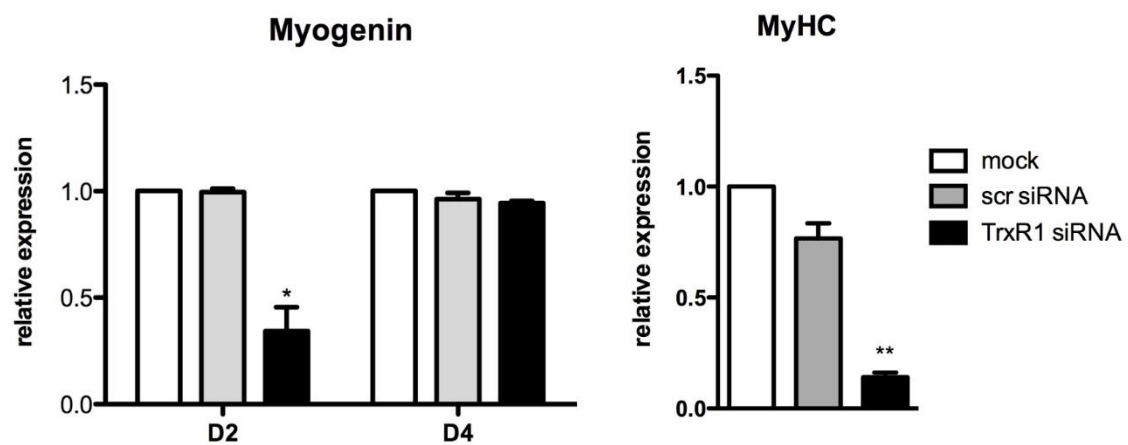

c)

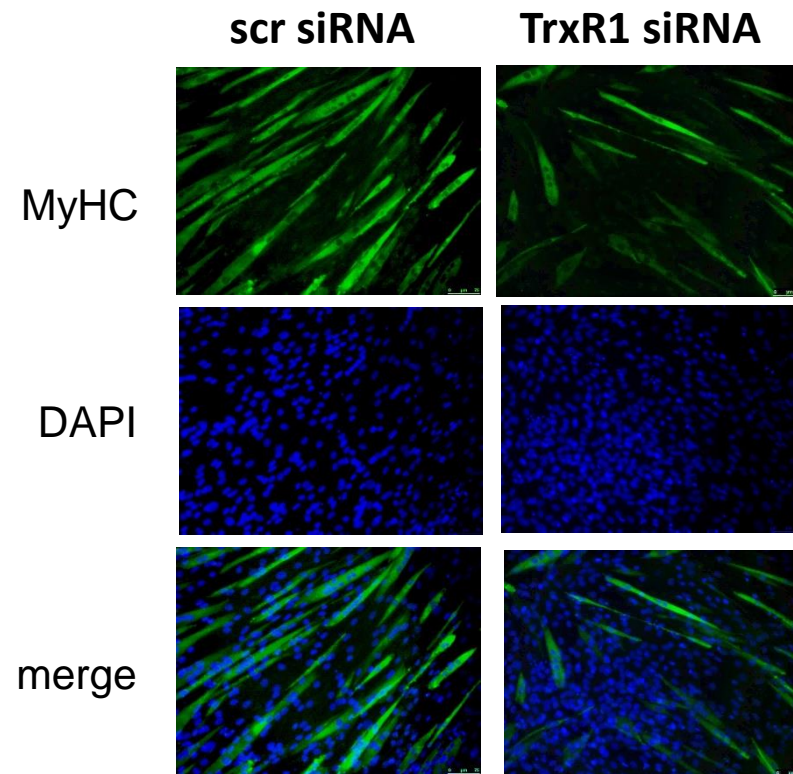

d)

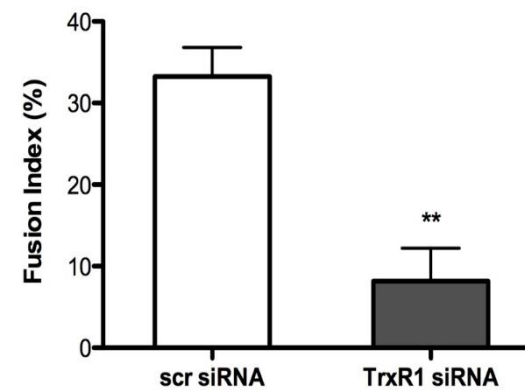

## Supplementary Fig. S5

a)

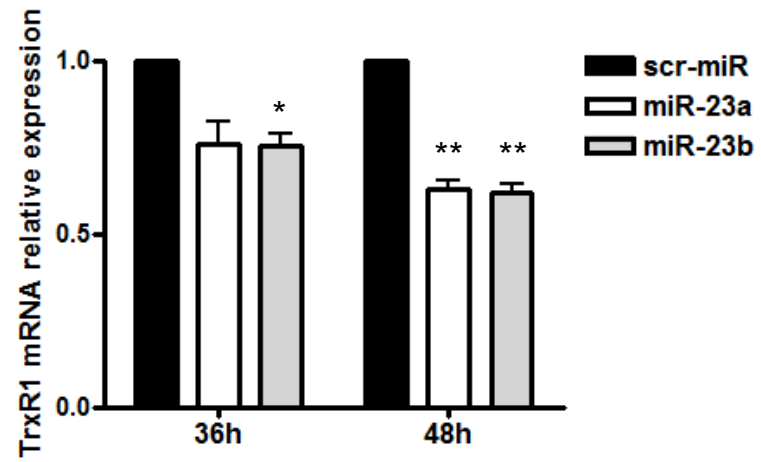

b)

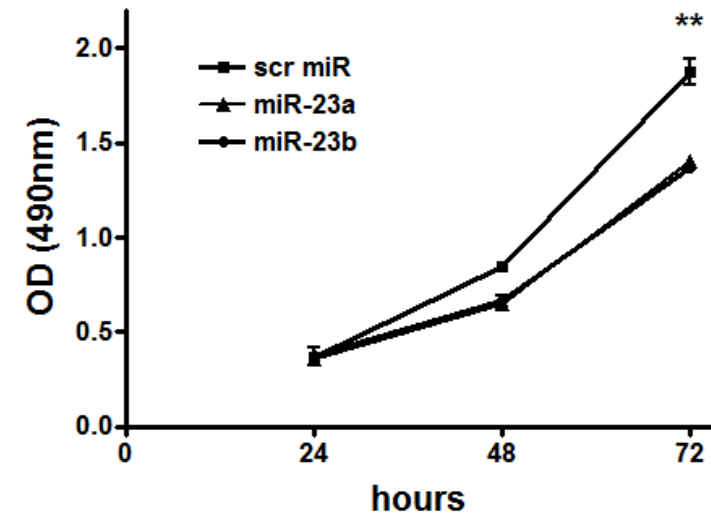

Supplement: 41598_2017_7575_MOESM1_ESM.pdf [file 41598_2017_7575_MOESM1_ESM.pdf]
